# Supplementary material for: Exploring the adsorption ability with sensitivity and reactivity of C12–B6N6, C12–Al6N6, and B6N6–Al6N6 heteronanocages towards the cisplatin drug: a DFT, AIM, and COSMO analysis
Source: Royal Society of Chemistry journal article supplement (doi:10.1039/d2ra04011e), 2022-01-01
Supplement: d2ra04011e1.pdf [file d2ra04011e1.pdf]

## Supplementary Information

### Exploring the adsorption ability with sensitivity and reactivity of $C_{12}-B_6N_6$ , $C_{12}-Al_6N_6$ and $B_6N_6-Al_6N_6$ heteronanocages towards the cisplatin drug: A DFT, AIM and COSMO analysis

Md. Golam Muktedir, Ariful Alam, Afiya Akter Piya and Siraj Ud Daula Shamim

Department of Physics, Mawlana Bhashani Science and Technology University, Tangail,  
Bangladesh.

Corresponding Author: Siraj Ud Daula Shamim (sdshamim@mbstu.ac.bd)

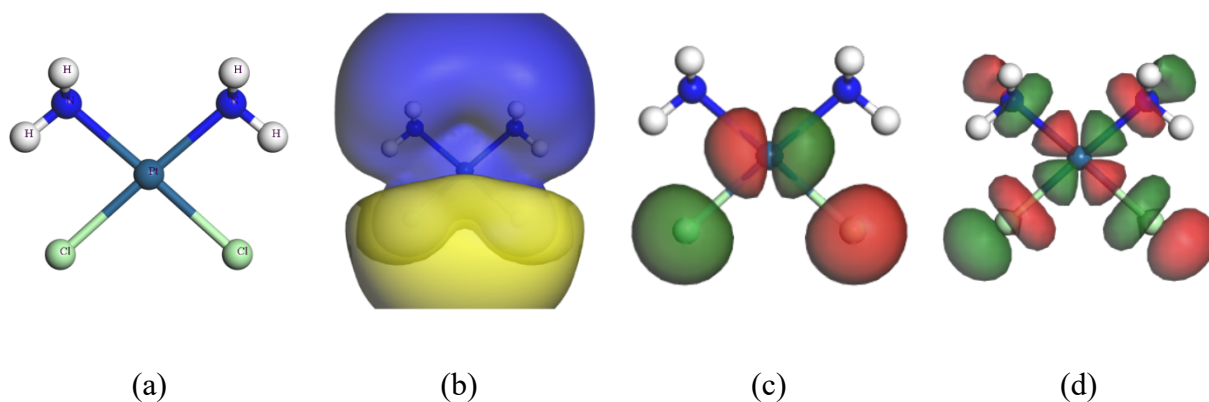

**Fig. S11:** (a) Optimized structure, (b) ESP, (c) HOMO and (d) LUMO maps of CP drug molecule.

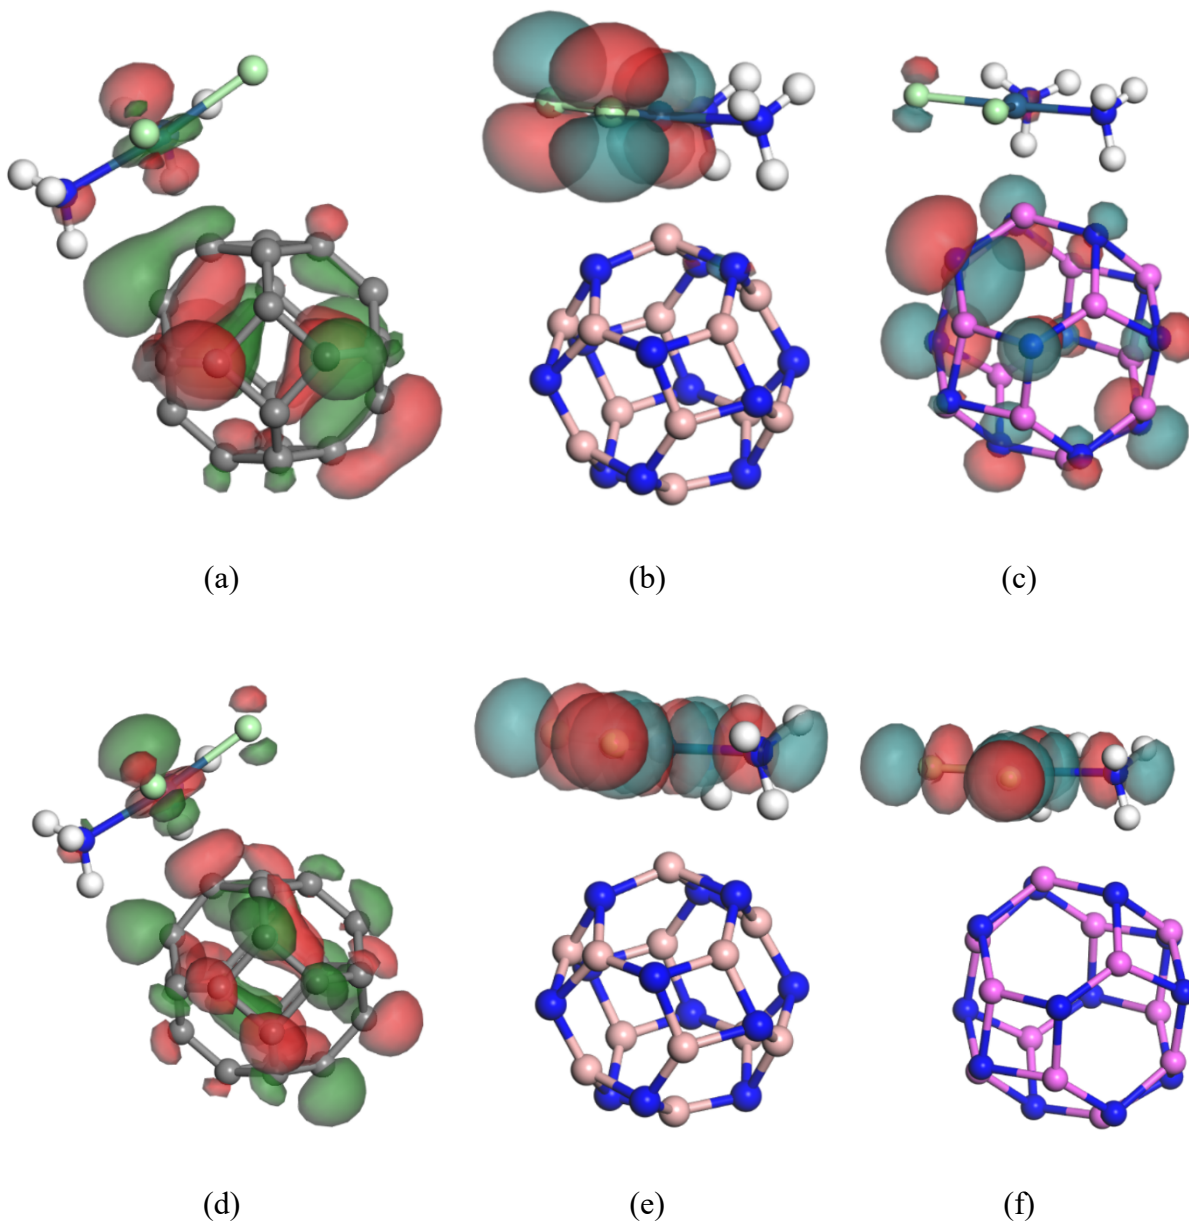

**Fig. SI2:** HOMO maps (a-c) and LUMO maps (d-f) of CP/C<sub>24</sub>, CP/B<sub>12</sub>N<sub>12</sub> and CP/Al<sub>12</sub>N<sub>12</sub> complexes for S<sub>3</sub>, S<sub>2</sub> and S<sub>3</sub> states respectively.

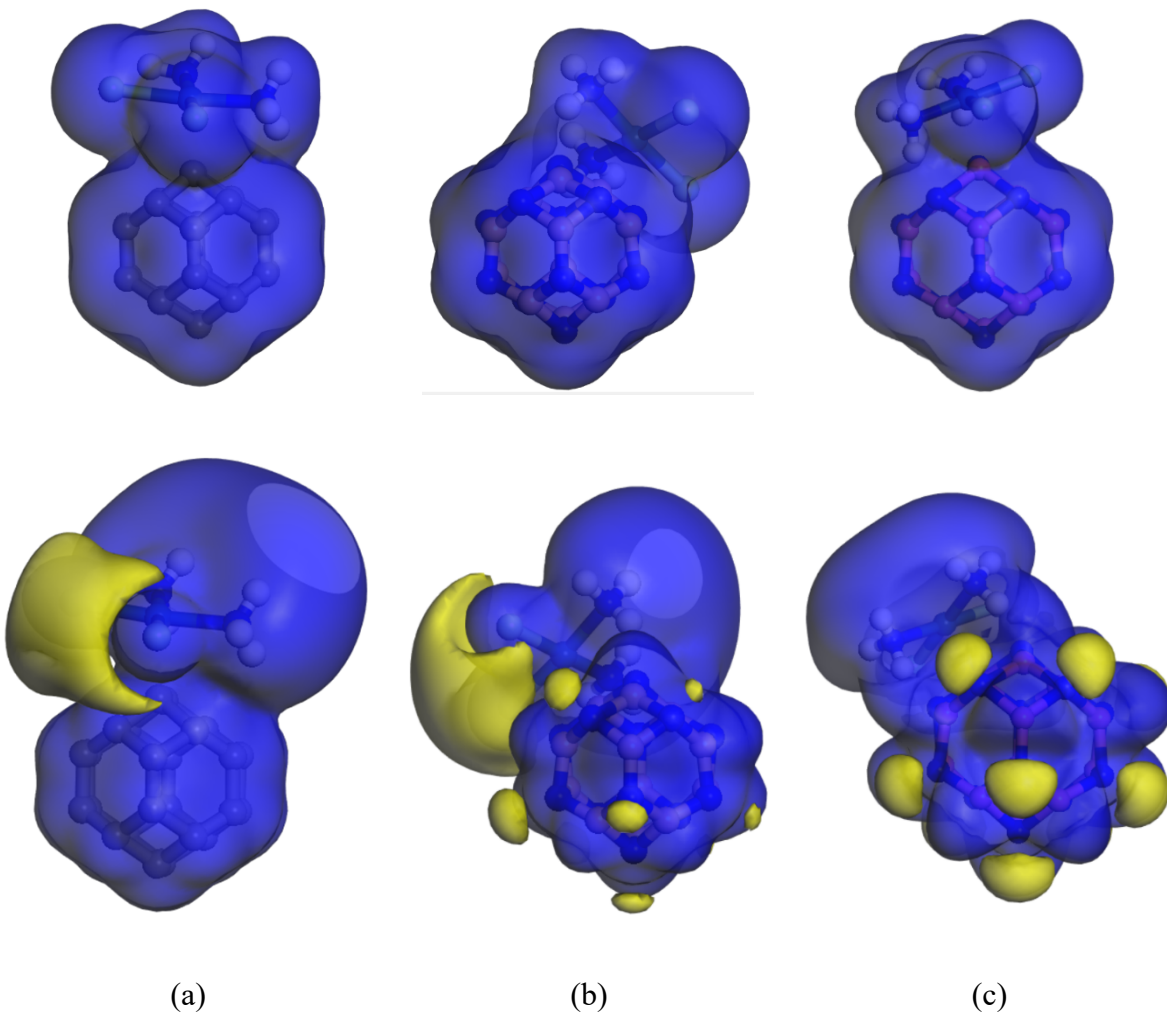

**Fig. S13:** EDM (top row) and ESP (bottom row) maps of (a) CP/C<sub>24</sub>, (b) CP/B<sub>12</sub>N<sub>12</sub> and (c) CP/Al<sub>12</sub>N<sub>12</sub> for S<sub>3</sub>, S<sub>2</sub> and S<sub>3</sub> states respectively.

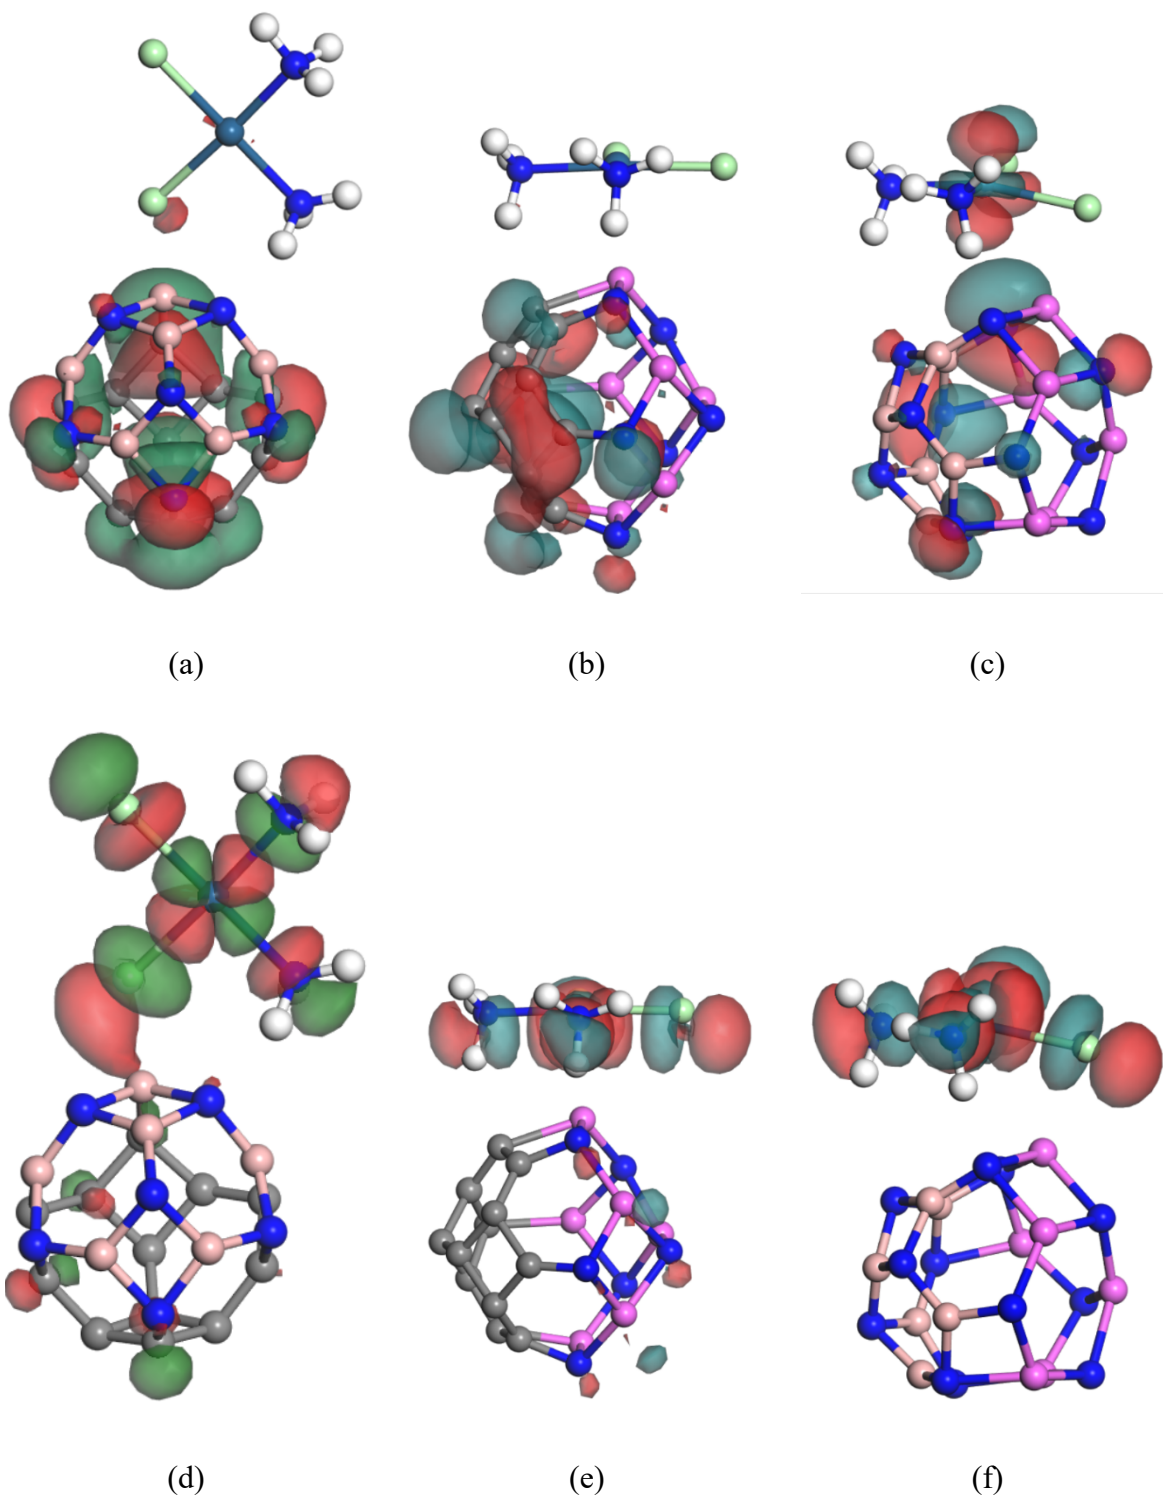

**Fig. S14:** HOMO maps (a-c) and LUMO maps (d-f) of CP/C<sub>12</sub>-B<sub>6</sub>N<sub>6</sub>, CP/C<sub>12</sub>-Al<sub>6</sub>N<sub>6</sub> and CP/B<sub>6</sub>N<sub>6</sub>-Al<sub>6</sub>N<sub>6</sub> complexes of our most stable states (S<sub>3</sub>, S<sub>2</sub> and S<sub>2</sub>) respectively.

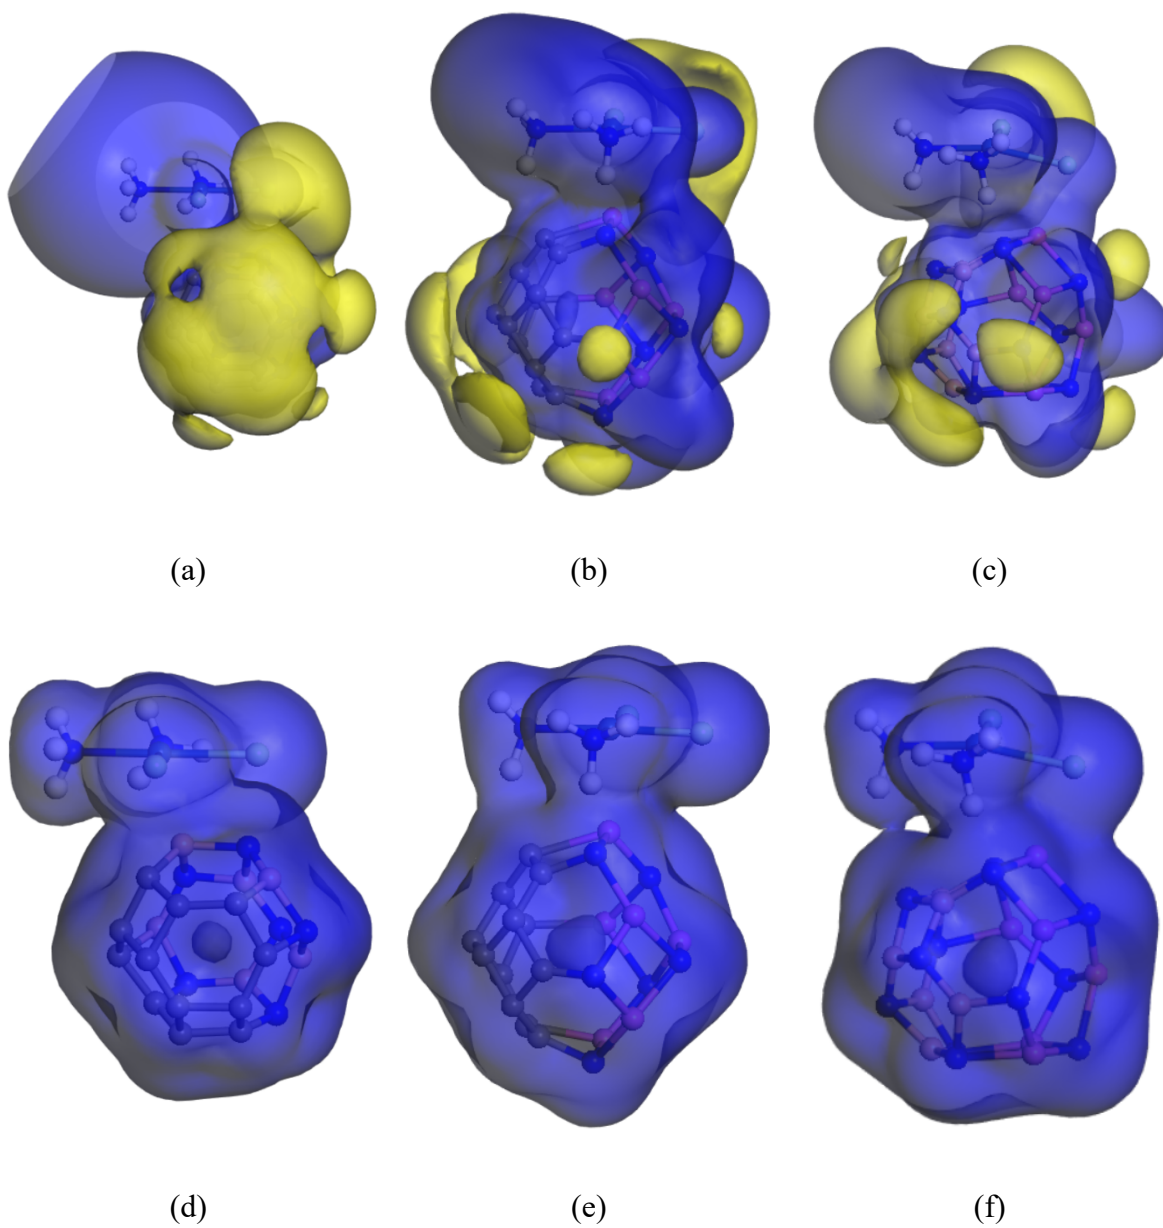

**Fig. SI5:** ESP (top row) and EDM (bottom row) maps of (a & d) CP/C<sub>12</sub>-B<sub>6</sub>N<sub>6</sub>, (b & e) CP/C<sub>12</sub>-Al<sub>6</sub>N<sub>6</sub> and (c & f) CP/B<sub>6</sub>N<sub>6</sub>-Al<sub>6</sub>N<sub>6</sub> for S<sub>3</sub>, S<sub>2</sub> and S<sub>2</sub> states respectively.

**Table S11:**

Fermi level energies ( $E_F$ ), work function ( $\phi$ ) and change in work function ( $\% \phi$ ) for CP/C<sub>24</sub>, CP/B<sub>12</sub>N<sub>12</sub> and CP/Al<sub>12</sub>N<sub>12</sub> complexes in both gas and water phases.

| Structure                           | State | Gas Phase  |             |           | Water Phase |             |           |
|-------------------------------------|-------|------------|-------------|-----------|-------------|-------------|-----------|
|                                     |       | $E_F$ (eV) | $\phi$ (eV) | $\% \phi$ | $E_F$ (eV)  | $\phi$ (eV) | $\% \phi$ |
| CP                                  |       | -3.65      | 3.65        |           | -3.92       | 3.92        |           |
| C <sub>24</sub>                     |       | -5.12      | 5.12        |           | -5.08       | 5.08        |           |
| CP/C <sub>24</sub>                  | S1    | -4.57      | 4.57        | -10.5     | -4.62       | 4.62        | -8.8      |
| CP/C <sub>24</sub>                  | S2    | -4.87      | 4.87        | -4.8      | -4.98       | 4.98        | -1.9      |
| CP/C <sub>24</sub>                  | S3    | -4.61      | 4.61        | -9.8      | -4.64       | 4.64        | -8.6      |
| CP/C <sub>24</sub>                  | S4    | -5.24      | 5.24        | 2.4       | -5.10       | 5.10        | 0.4       |
| B <sub>12</sub> N <sub>12</sub>     |       | -4.62      | 4.62        |           | -4.59       | 4.59        |           |
| CP/B <sub>12</sub> N <sub>12</sub>  | S1    | -4.47      | 4.47        | -3.2      | -4.28       | 4.28        | -6.6      |
| CP/B <sub>12</sub> N <sub>12</sub>  | S2    | -4.65      | 4.65        | 0.5       | -4.63       | 4.63        | 0.9       |
| CP/B <sub>12</sub> N <sub>12</sub>  | S3    | -4.46      | 4.46        | -3.4      | -4.29       | 4.29        | -6.4      |
| CP/B <sub>12</sub> N <sub>12</sub>  | S4    | -4.37      | 4.37        | -5.4      | -4.32       | 4.32        | -5.7      |
| Al <sub>12</sub> N <sub>12</sub>    |       | -4.27      | 4.27        |           | -4.45       | 4.45        |           |
| CP/Al <sub>12</sub> N <sub>12</sub> | S1    | -4.20      | 4.20        | -1.4      | -4.32       | 4.32        | -2.8      |
| CP/Al <sub>12</sub> N <sub>12</sub> | S2    | -4.03      | 4.03        | -5.4      | -4.19       | 4.19        | -5.8      |
| CP/Al <sub>12</sub> N <sub>12</sub> | S3    | -4.21      | 4.21        | -1.3      | -4.33       | 4.33        | -2.6      |
| CP/Al <sub>12</sub> N <sub>12</sub> | S4    | -4.05      | 4.05        | -4.9      | -4.17       | 4.17        | -6.3      |

**Table S12:**

Fermi level energies ( $E_F$ ), work function ( $\phi$ ) and change in work function ( $\% \phi$ ) for CP/C<sub>12</sub>-B<sub>6</sub>N<sub>6</sub>, CP/C<sub>12</sub>-Al<sub>6</sub>N<sub>6</sub> and CP/B<sub>6</sub>N<sub>6</sub>-Al<sub>6</sub>N<sub>6</sub> complexes in both gas and water phases.

| Structure | State | Gas Phase  |             |           | Water Phase |             |           |
|-----------|-------|------------|-------------|-----------|-------------|-------------|-----------|
|           |       | $E_F$ (eV) | $\phi$ (eV) | $\% \phi$ | $E_F$ (eV)  | $\phi$ (eV) | $\% \phi$ |
| CP        |       | -3.65      | 3.65        |           | -3.92       | 3.92        |           |

|                          |    |       |      |       |       |      |       |
|--------------------------|----|-------|------|-------|-------|------|-------|
| $C_{12}$ - $B_6N_6$      |    | -4.79 | 4.79 |       | -4.77 | 4.7  |       |
| CP/ $C_{12}$ - $B_6N_6$  | S1 | -4.36 | 4.36 | -9.06 | -4.34 | 4.34 | -9.05 |
| CP/ $C_{12}$ - $B_6N_6$  | S2 | -4.44 | 4.44 | 1.97  | -4.48 | 4.48 | 3.31  |
| CP/ $C_{12}$ - $B_6N_6$  | S3 | -4.18 | 4.18 | -5.97 | -4.25 | 4.25 | -5.19 |
| $C_{12}$ - $Al_6N_6$     |    | -3.98 | 3.98 |       | -4.17 | 4.17 |       |
| CP/ $C_{12}$ - $Al_6N_6$ | S1 | -3.94 | 3.94 | -0.95 | -4.02 | 4.02 | -3.56 |
| CP/ $C_{12}$ - $Al_6N_6$ | S2 | -3.84 | 3.84 | -2.63 | -3.99 | 3.99 | -0.86 |
| CP/ $C_{12}$ - $Al_6N_6$ | S3 | -3.84 | 3.84 | 0.13  | -4.19 | 4.19 | 5.13  |
| $B_6N_6$ - $Al_6N_6$     |    | -4.51 | 4.51 |       | -4.72 | 4.72 |       |
| CP/ $B_6N_6$ - $Al_6N_6$ | S1 | -4.55 | 4.55 | 0.99  | -4.58 | 4.58 | -3.00 |
| CP/ $B_6N_6$ - $Al_6N_6$ | S2 | -4.23 | 4.23 | -7.04 | -4.20 | 4.20 | -8.27 |
| CP/ $B_6N_6$ - $Al_6N_6$ | S3 | -4.54 | 4.54 | 7.20  | -4.59 | 4.59 | 9.47  |
